# Supplementary material for: Activation of Epstein–Barr Virus’ Lytic Cycle in Nasopharyngeal Carcinoma Cells by NEO212, a Conjugate of Perillyl Alcohol and Temozolomide
Source: MDPI journal article supplement (doi:10.3390/cancers16050936), 2024-02-26

Figure S1: Uncropped blots of the Western blots used for Figure 3.

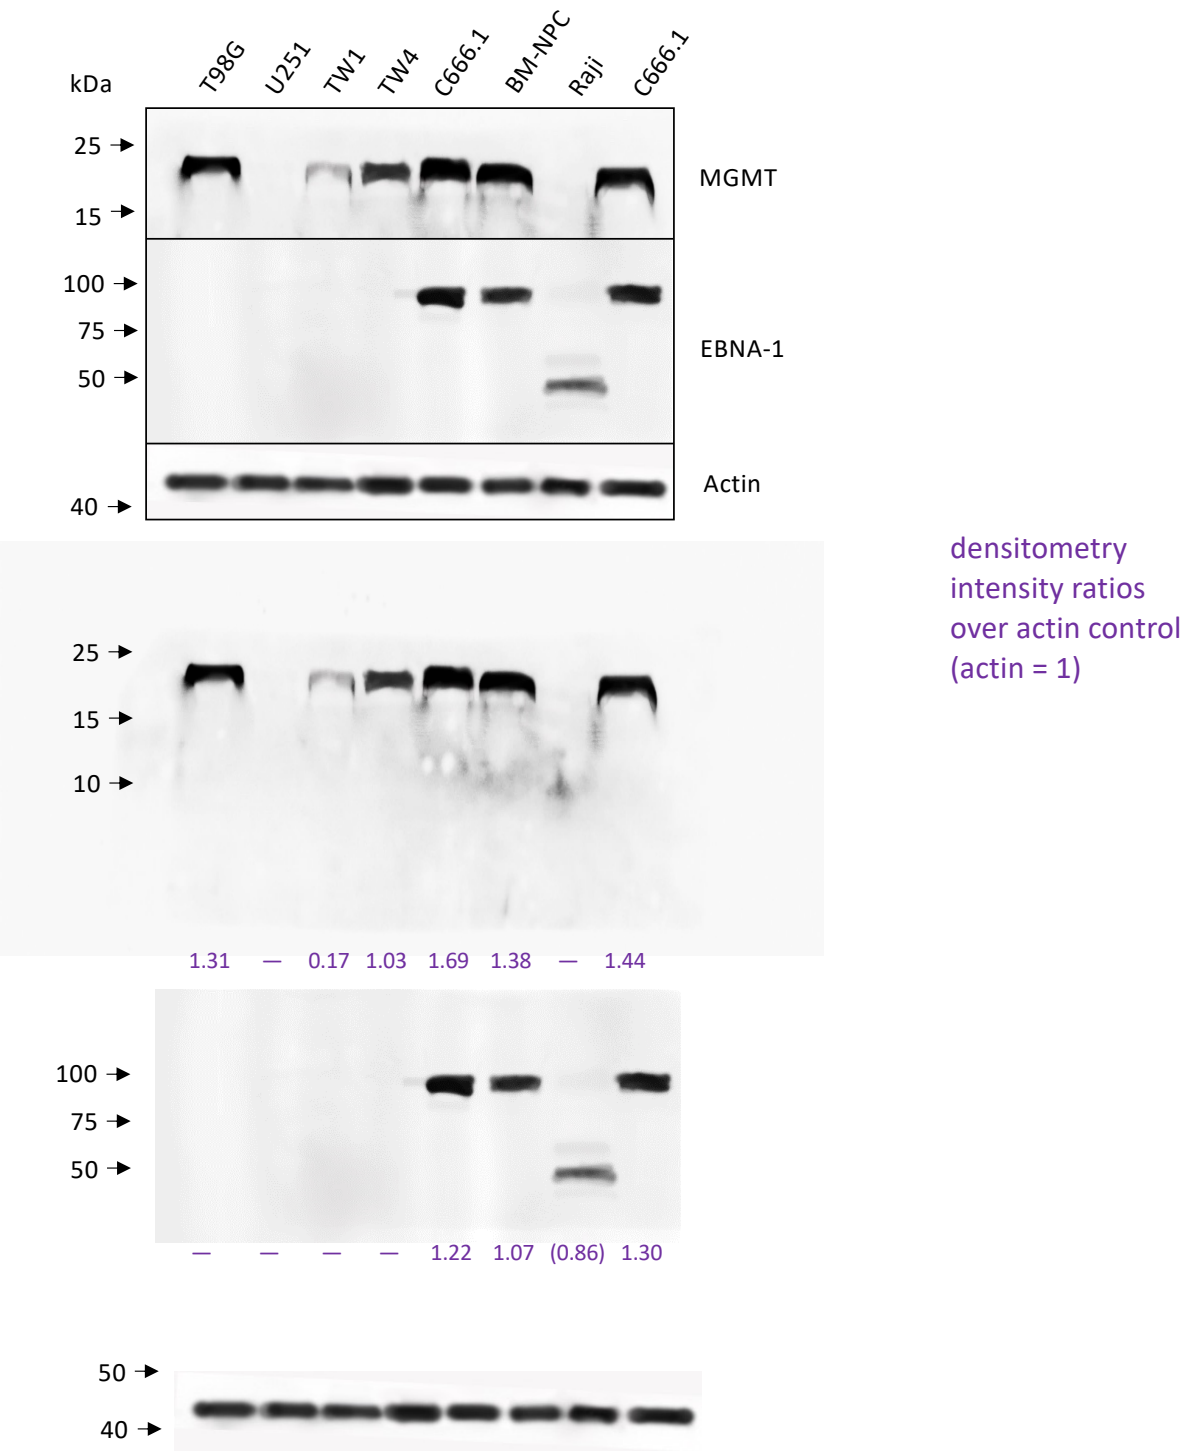

Figure S2: Uncropped blots of the Western blots used for Figure 4A.

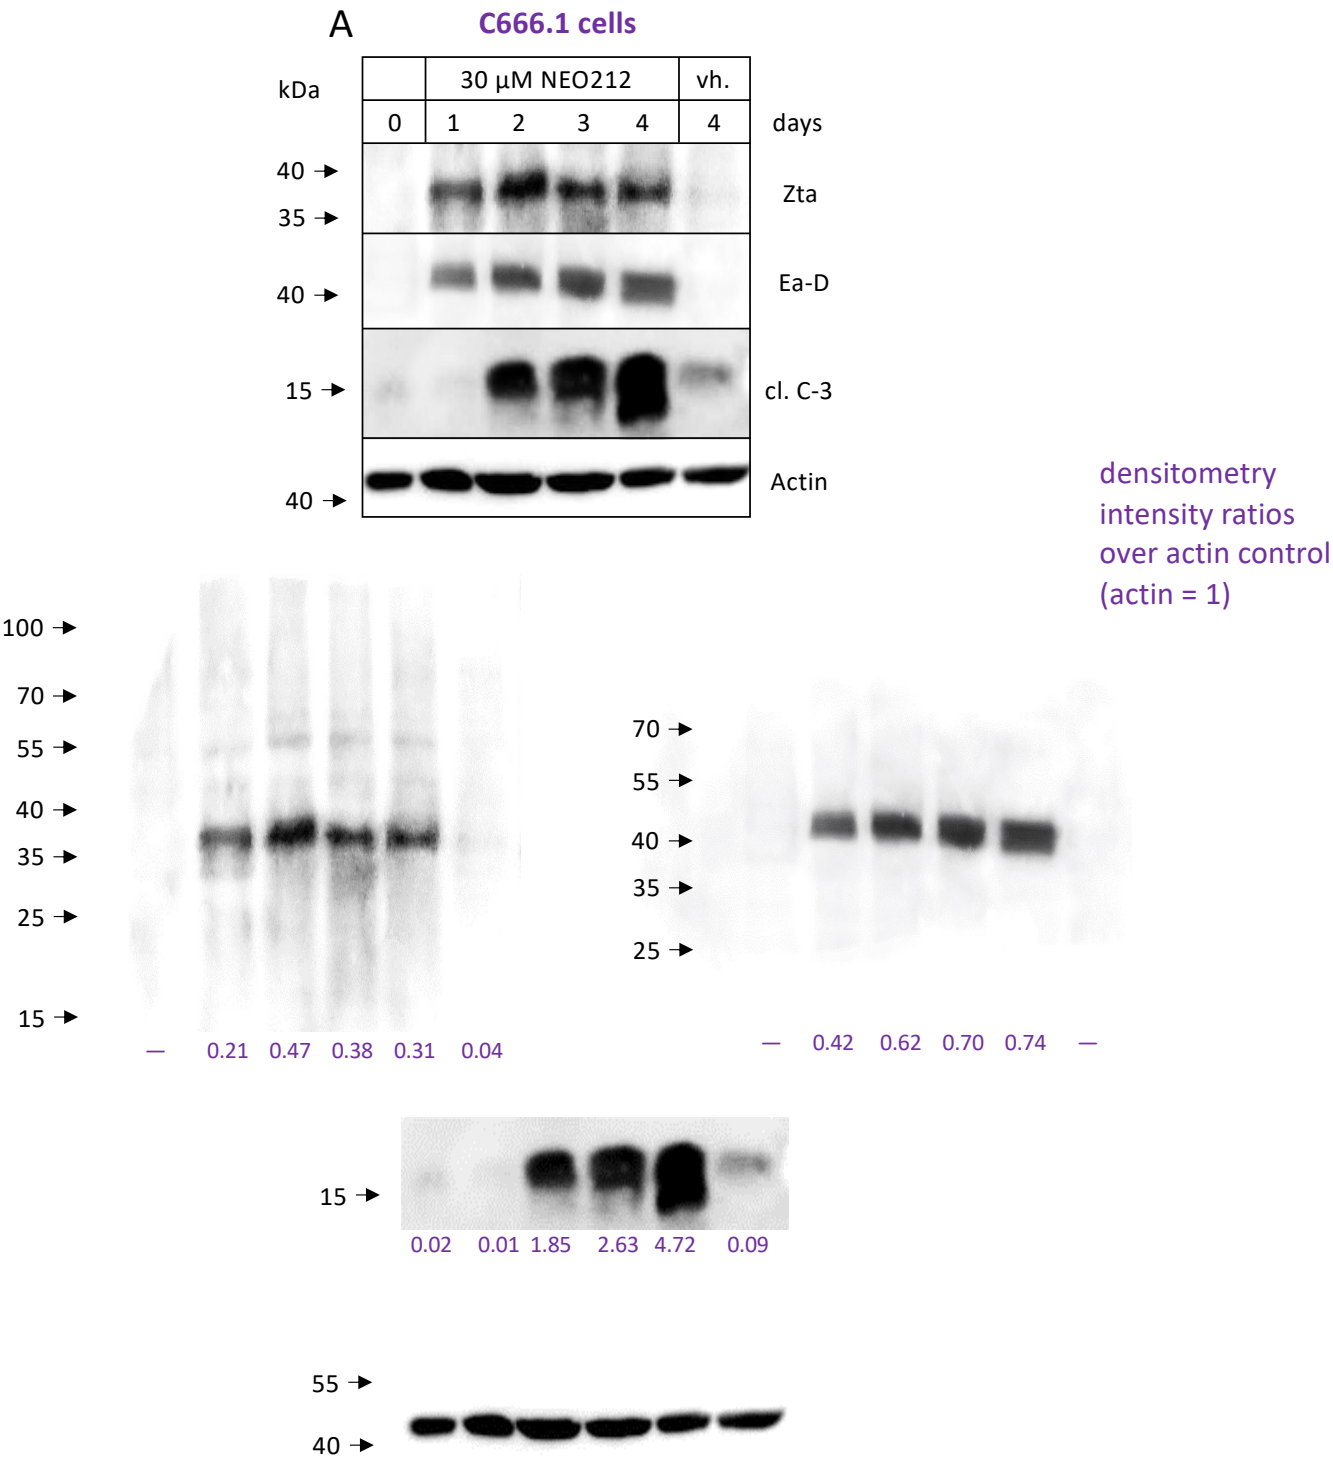

Figure S3: Uncropped blots of the Western blots used for Figure 4B.

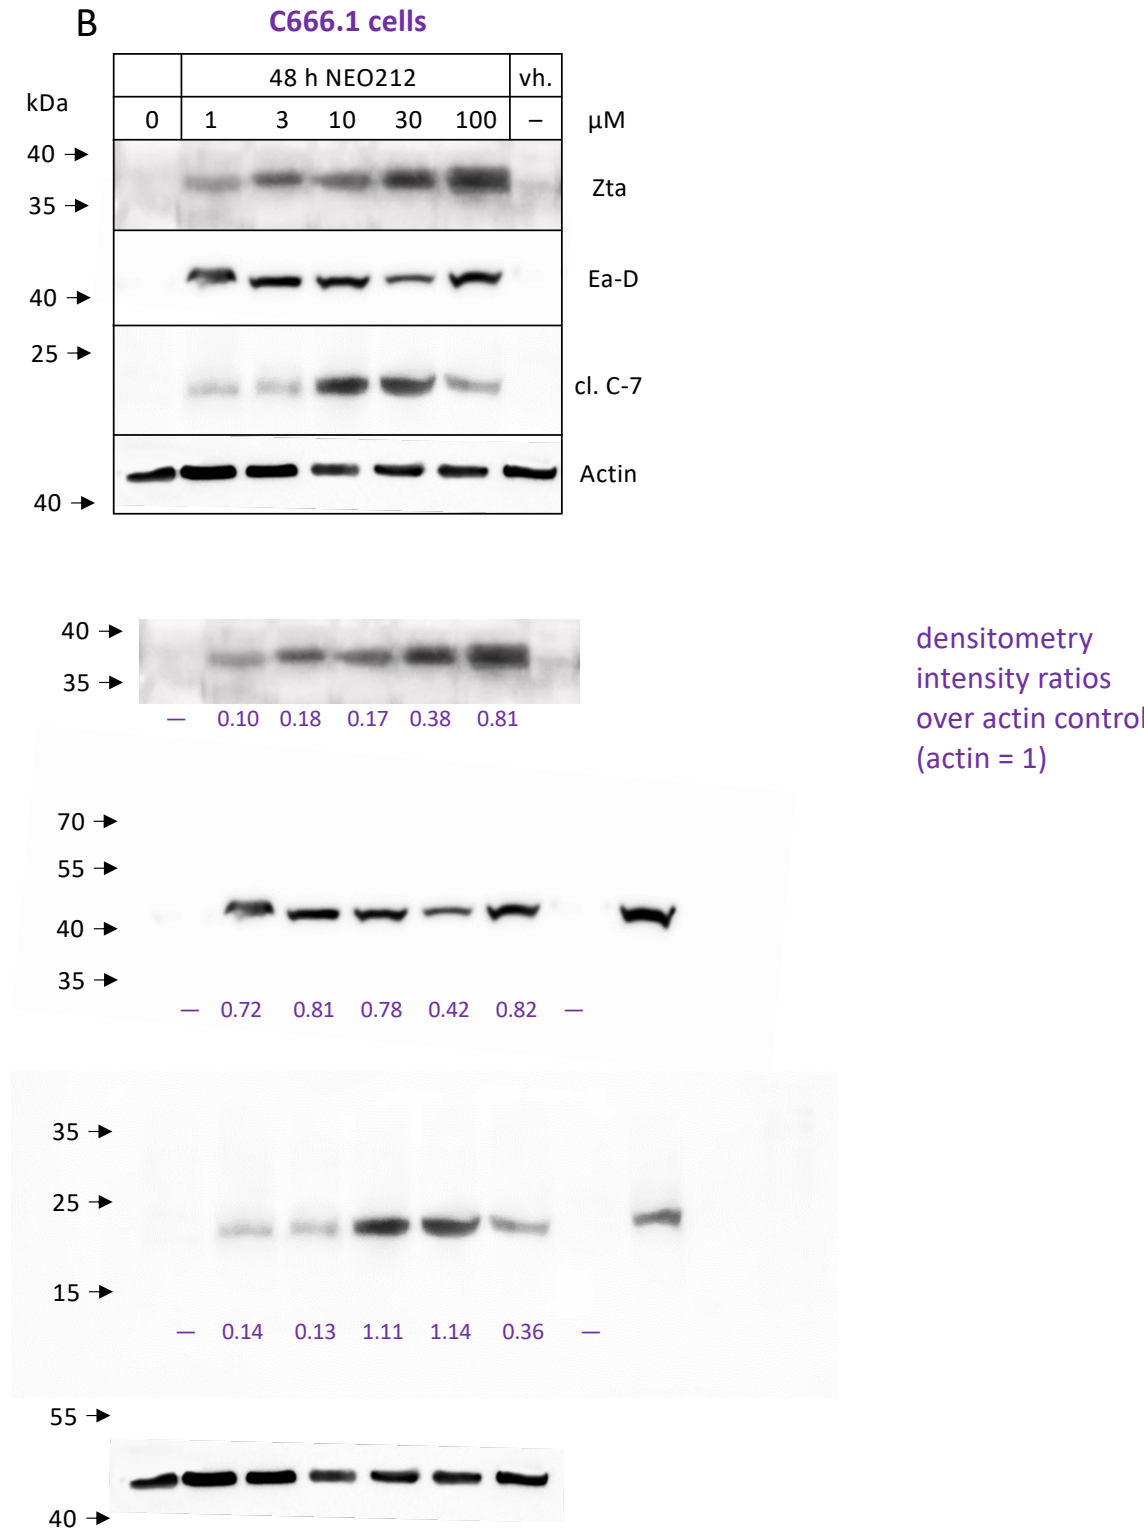

Figure S4: Uncropped blots of the Western blots used for Figure 4C.

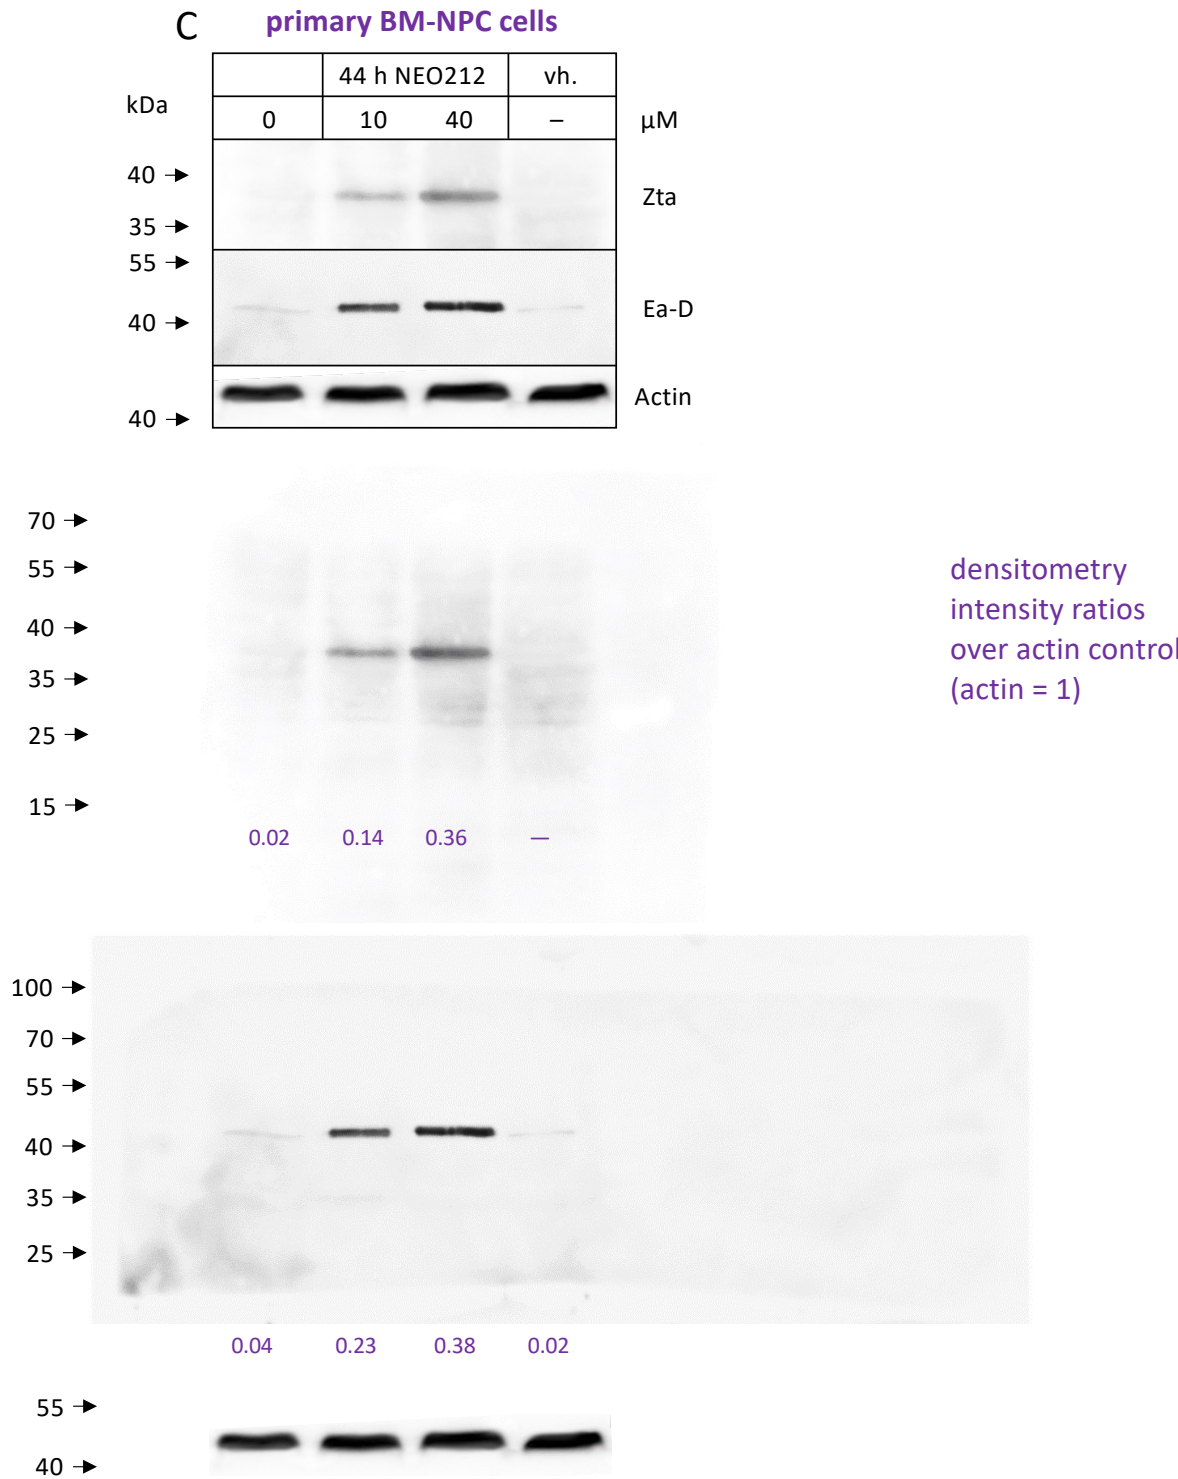

Figure S5: Uncropped blots of the Western blots used for Figure 4D.

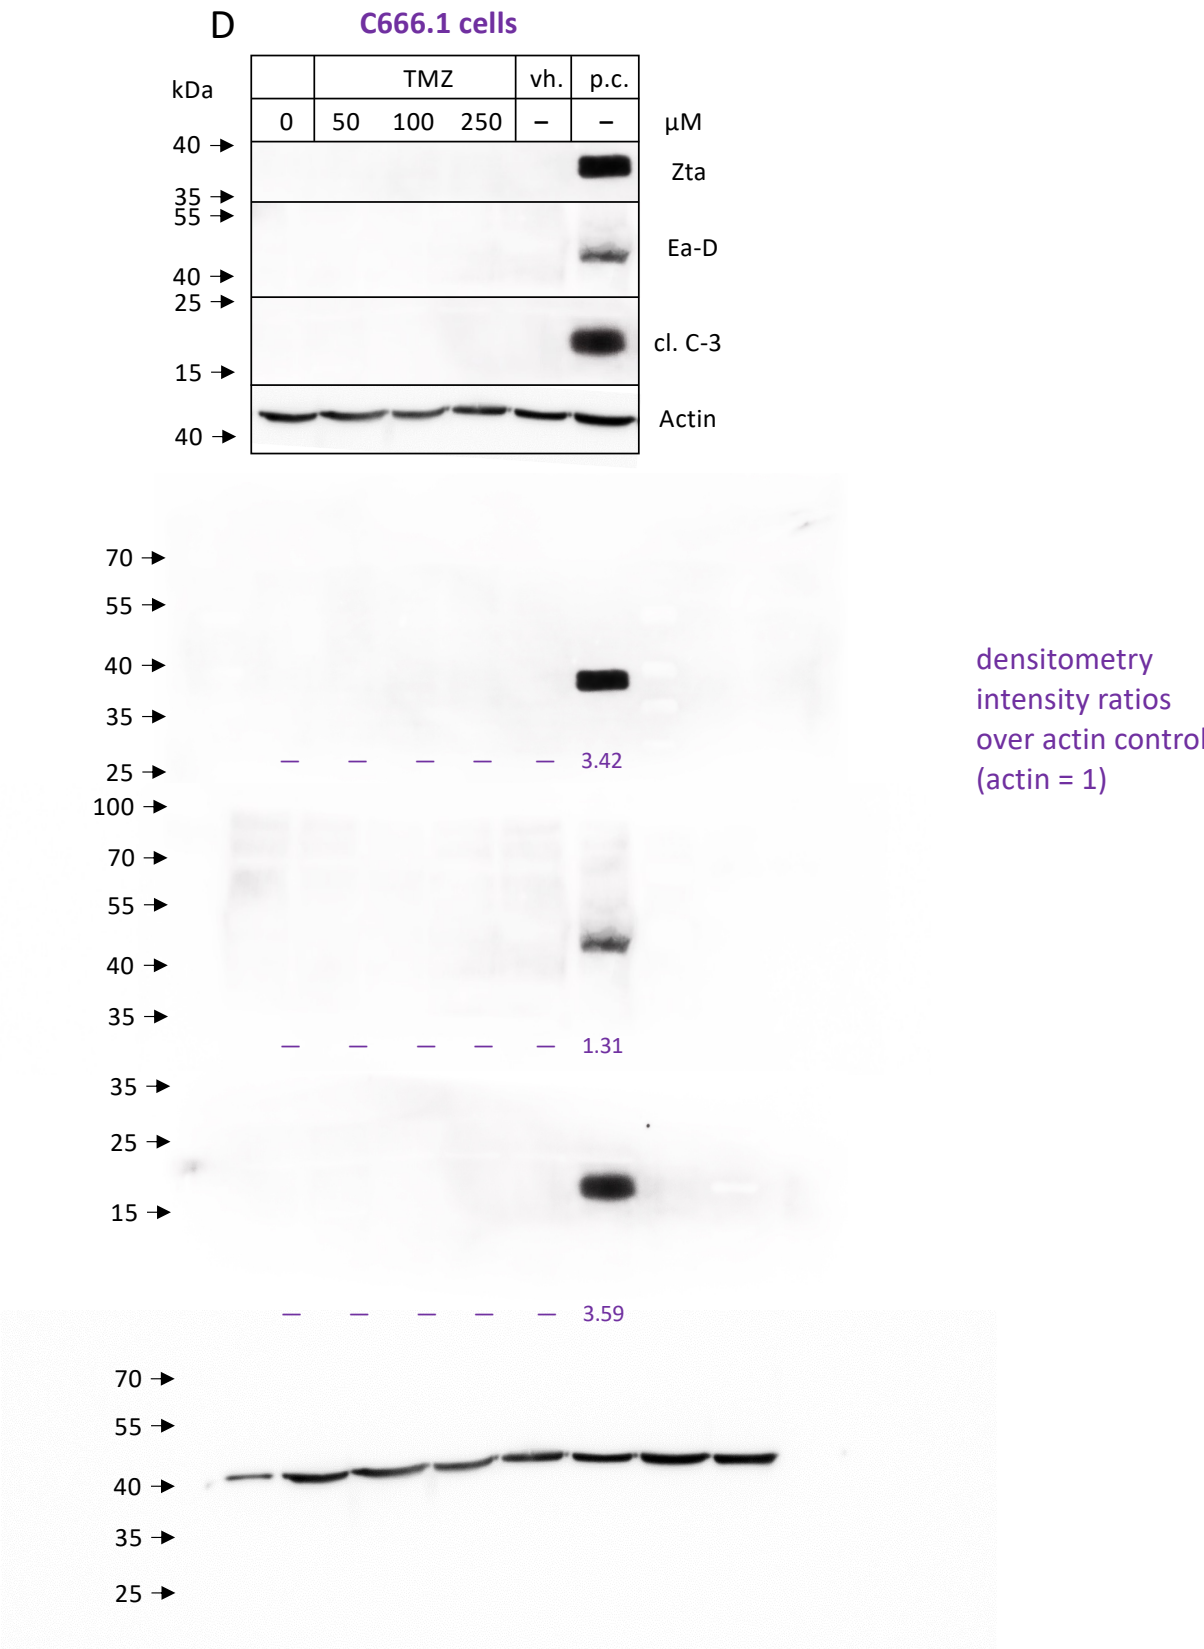

Figure S6: Uncropped blots of the Western blots used for Figure 4E.

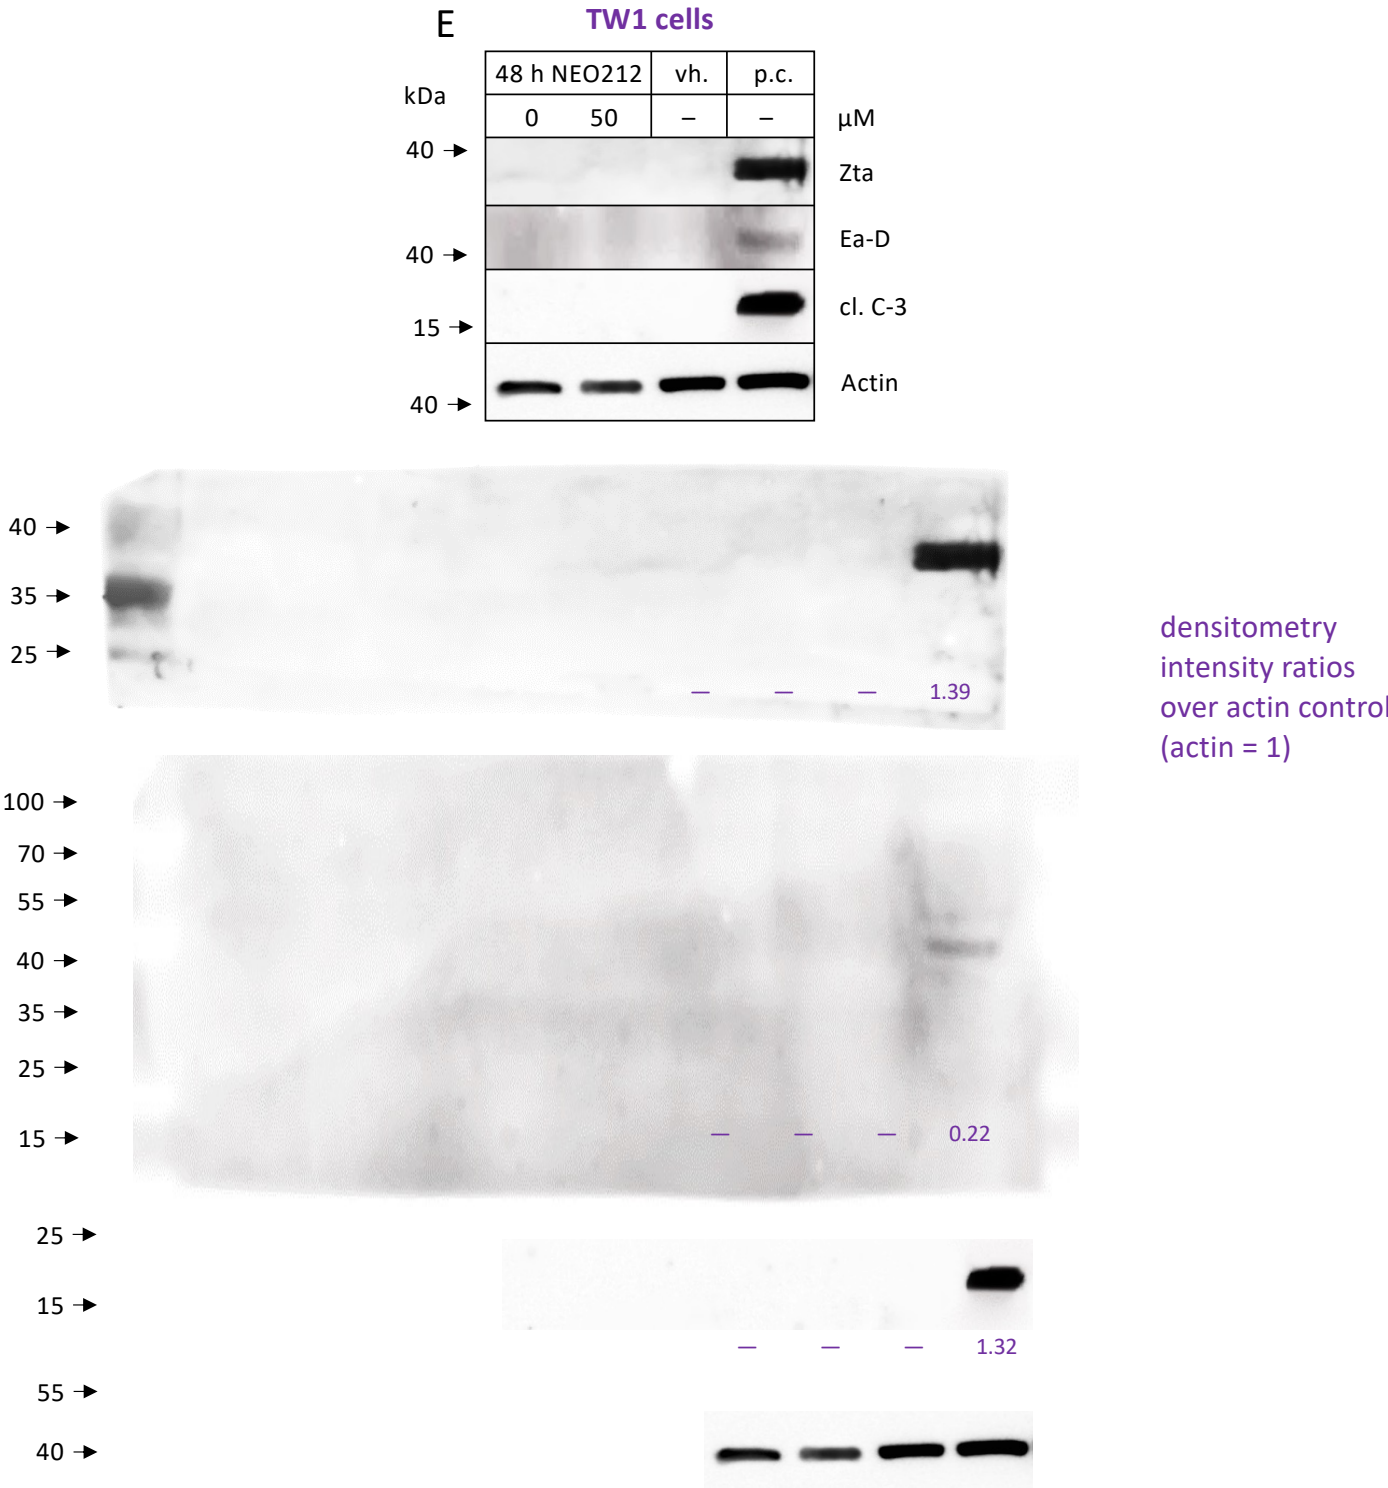

Figure S7: Uncropped blots of the Western blots used for Figure 6.

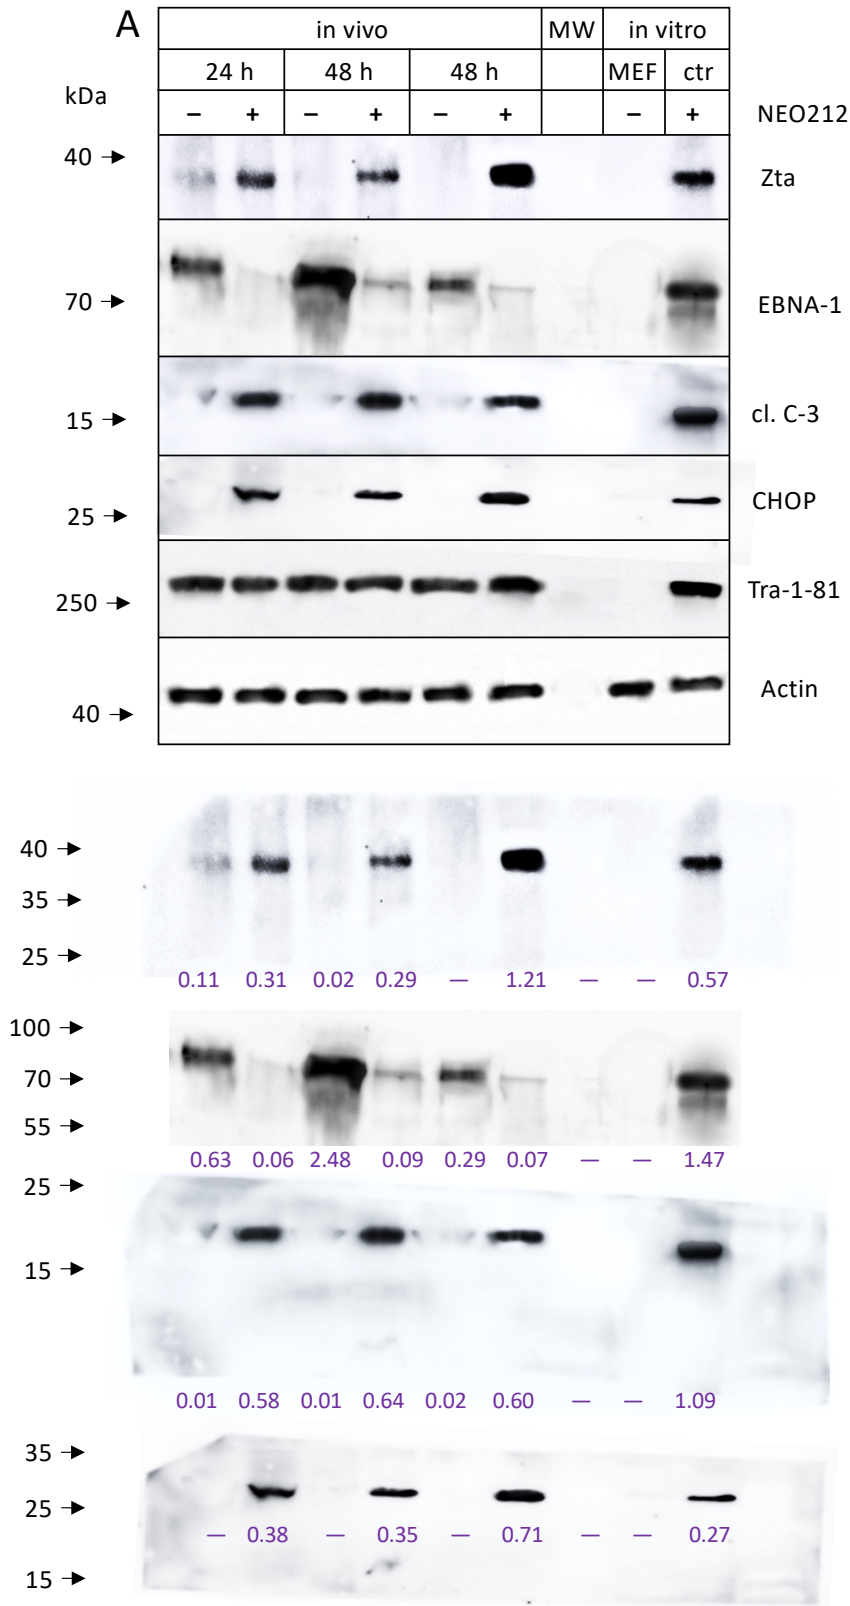

continued on next page

Figure S7 (continued): Uncropped blots of the Western blots used for Figure 6.

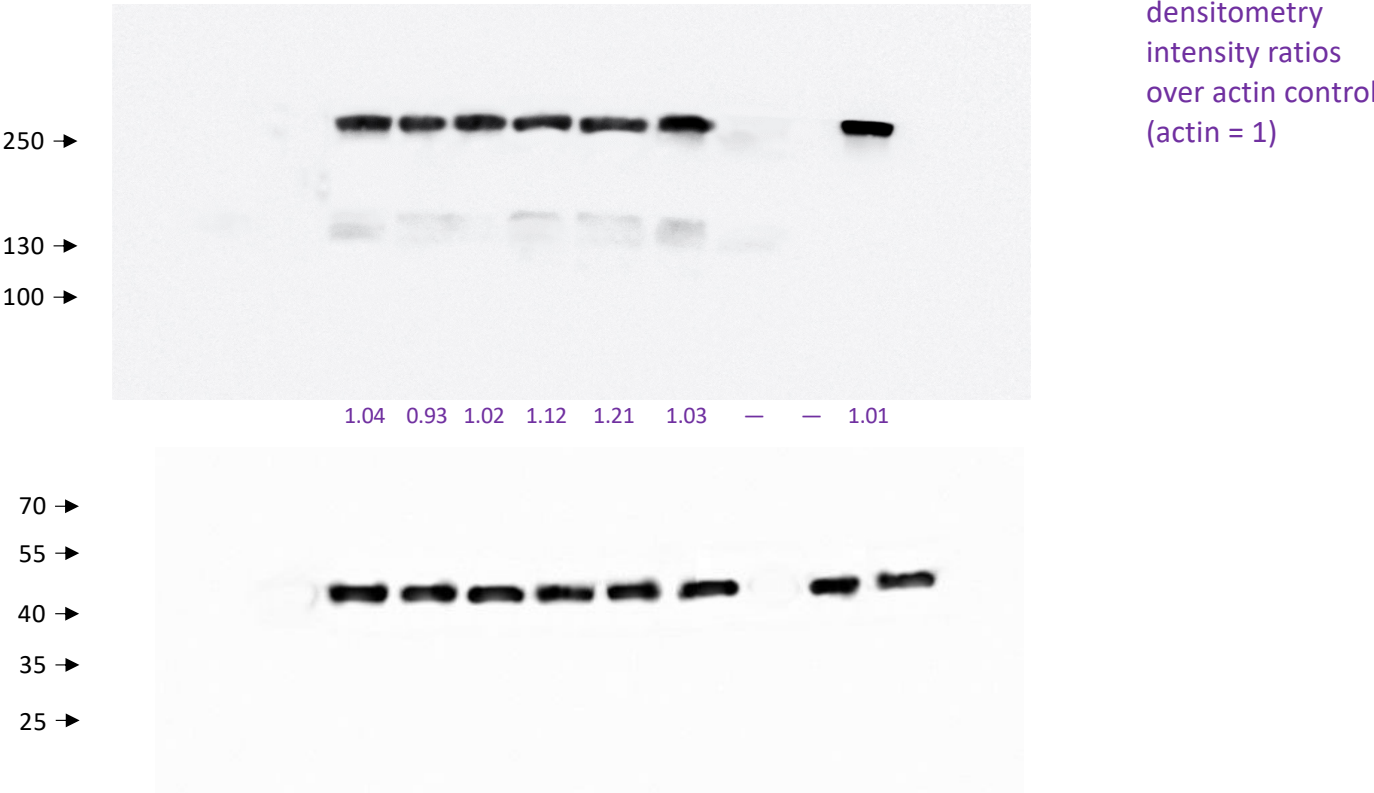

Figure S8: Uncropped blots of the Western blots used for Figure 6.

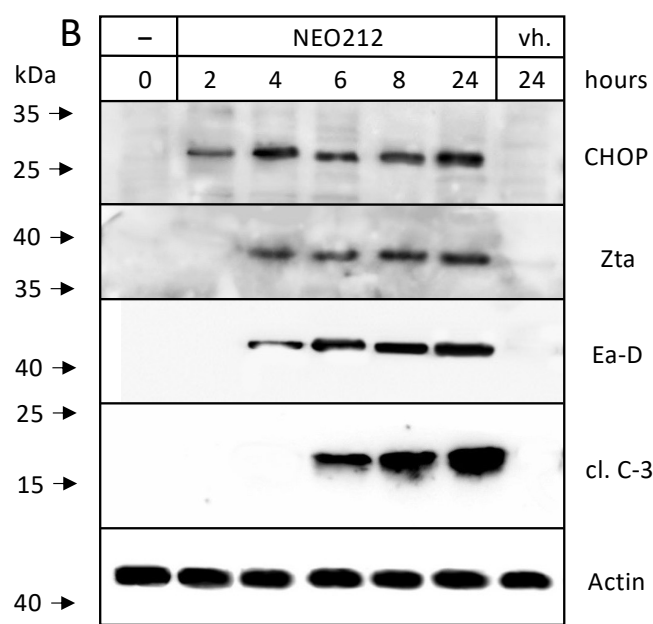

densitometry  
intensity ratios  
over actin control  
(actin = 1)

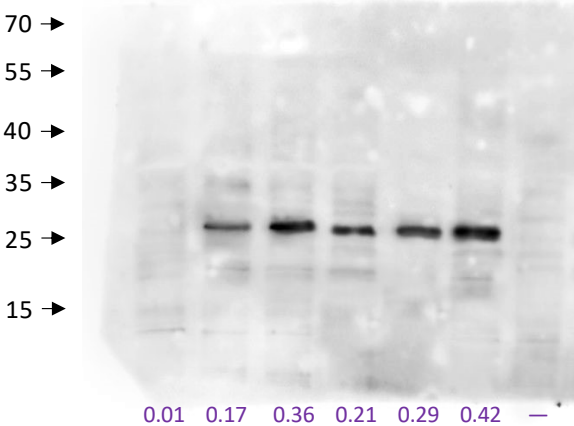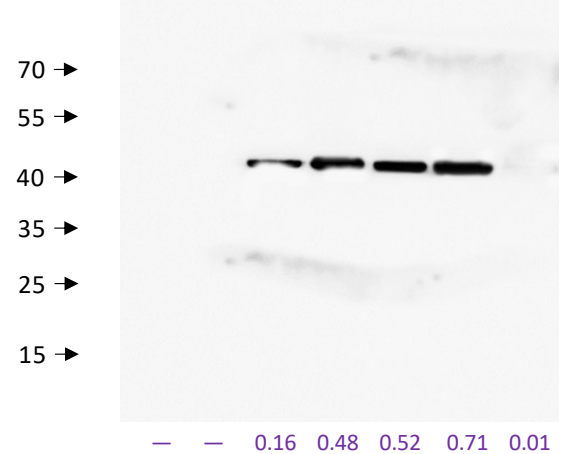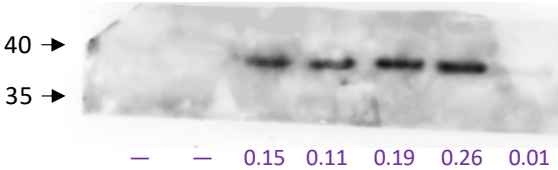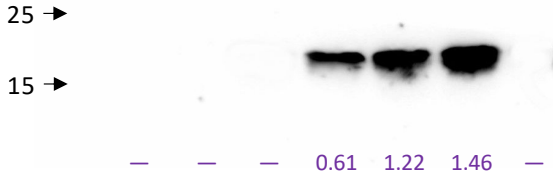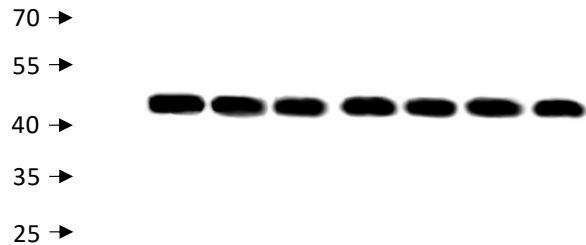

Figure S9: Uncropped blots of the Western blots used for Figure 7.

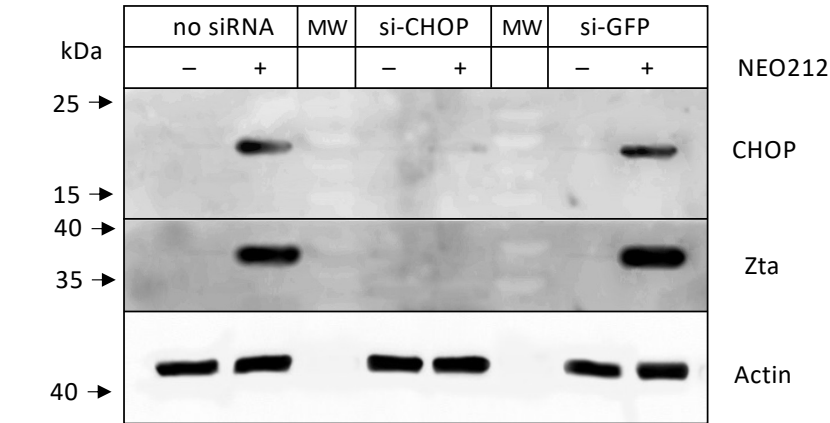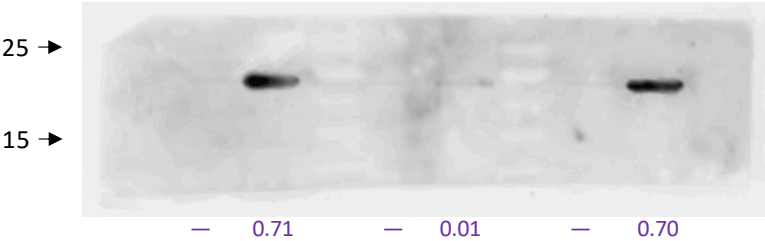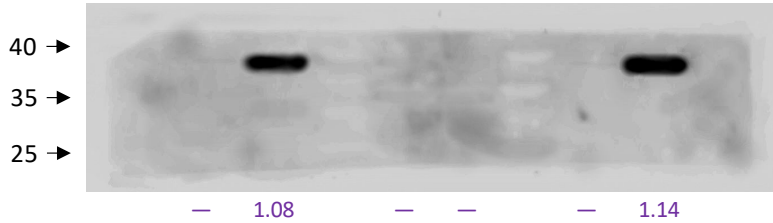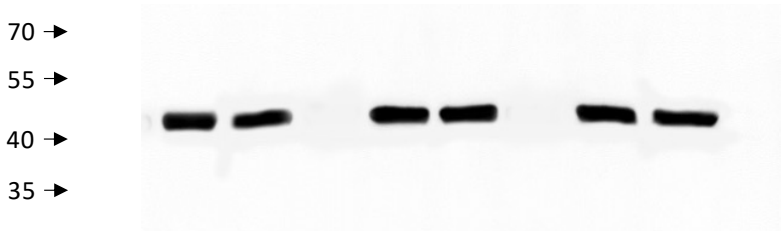

densitometry  
intensity ratios  
over actin control  
(actin = 1)

Figure S10: Uncropped blots of the Western blots used for Figure 8.

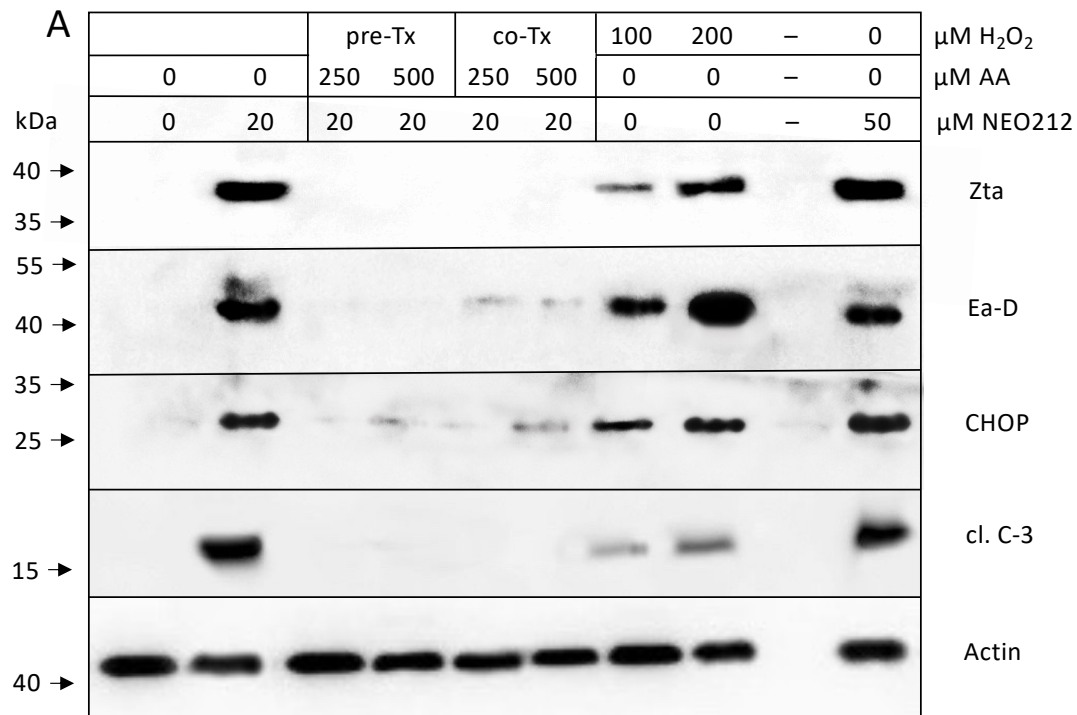

densitometry  
intensity ratios  
over actin control  
(actin = 1)

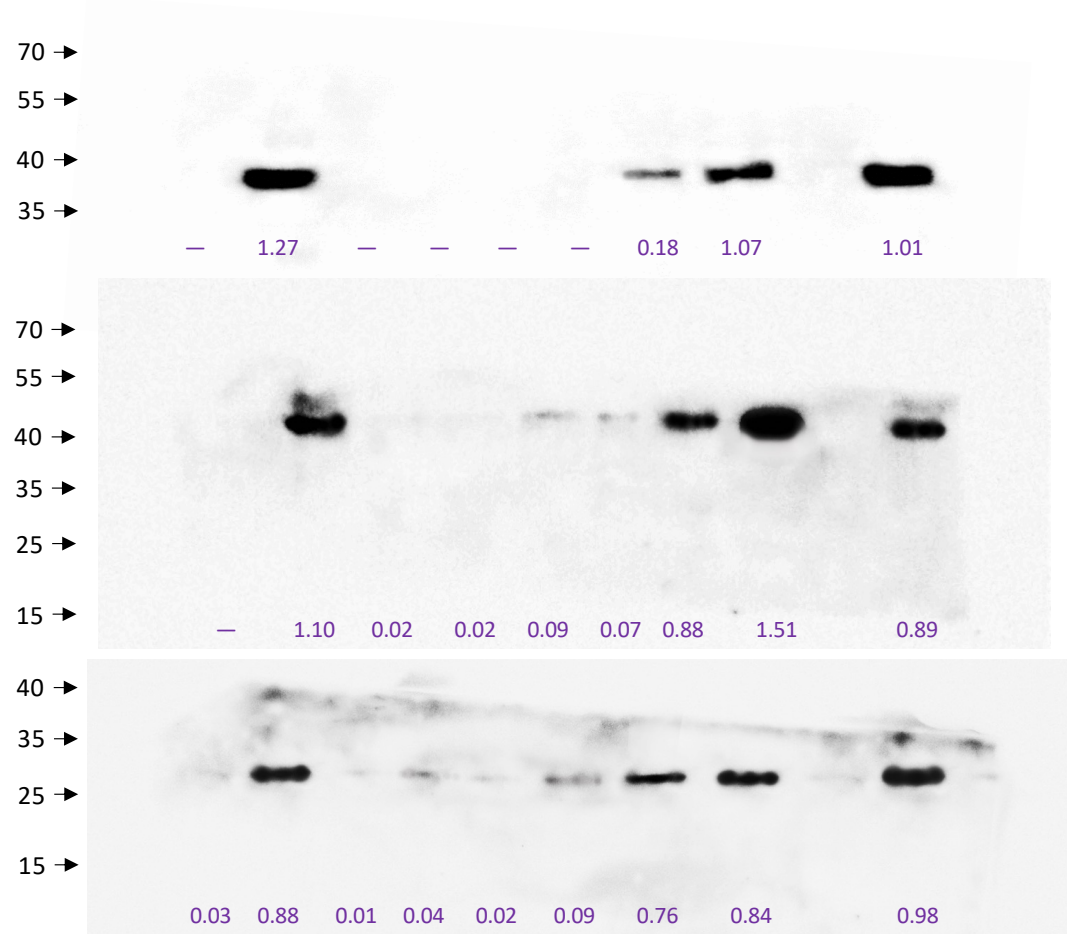

Figure S11: Uncropped blots of the Western blots used for Figure 8.

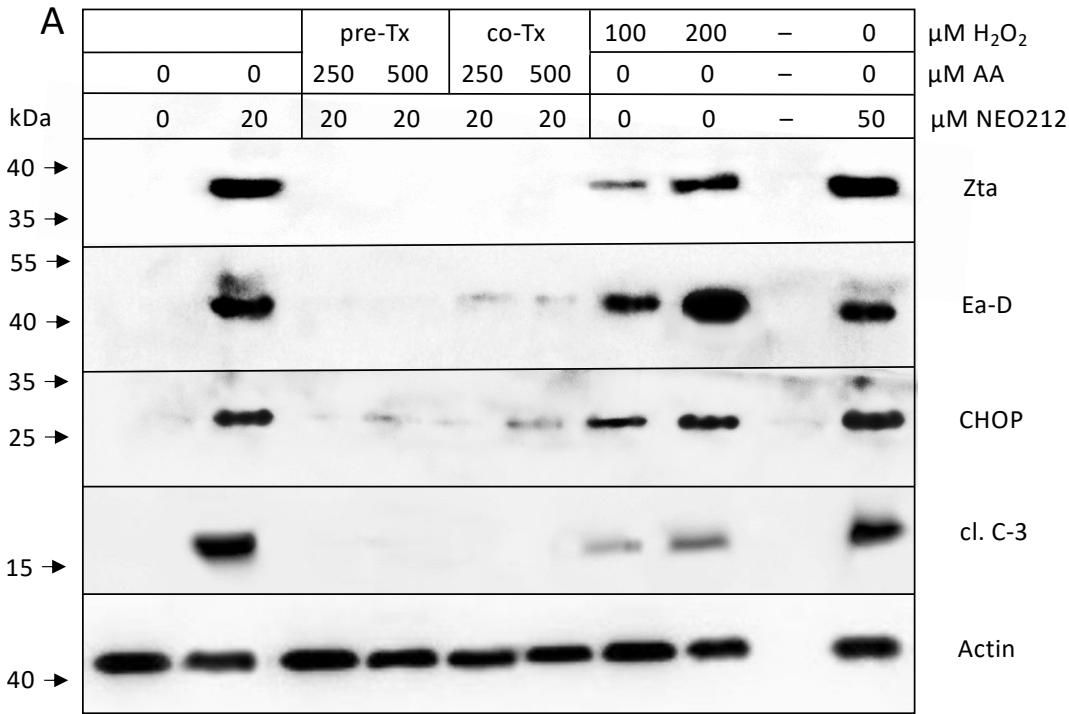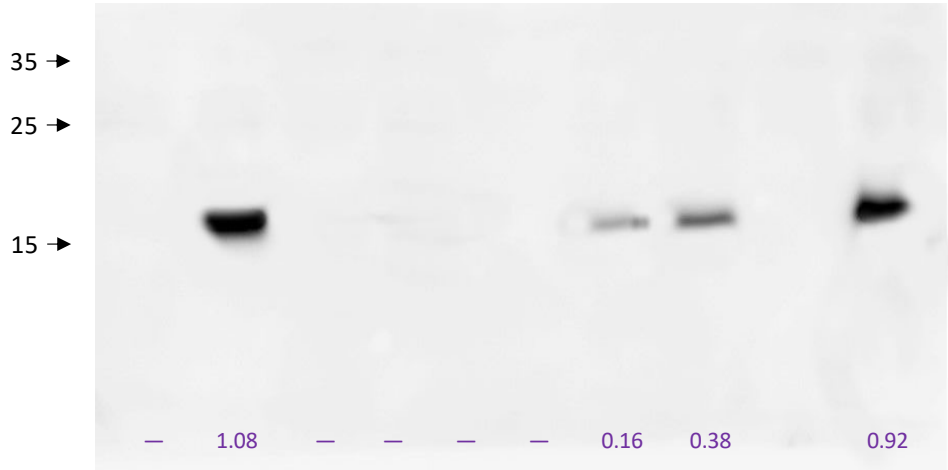

densitometry  
intensity ratios  
over actin control  
(actin = 1)

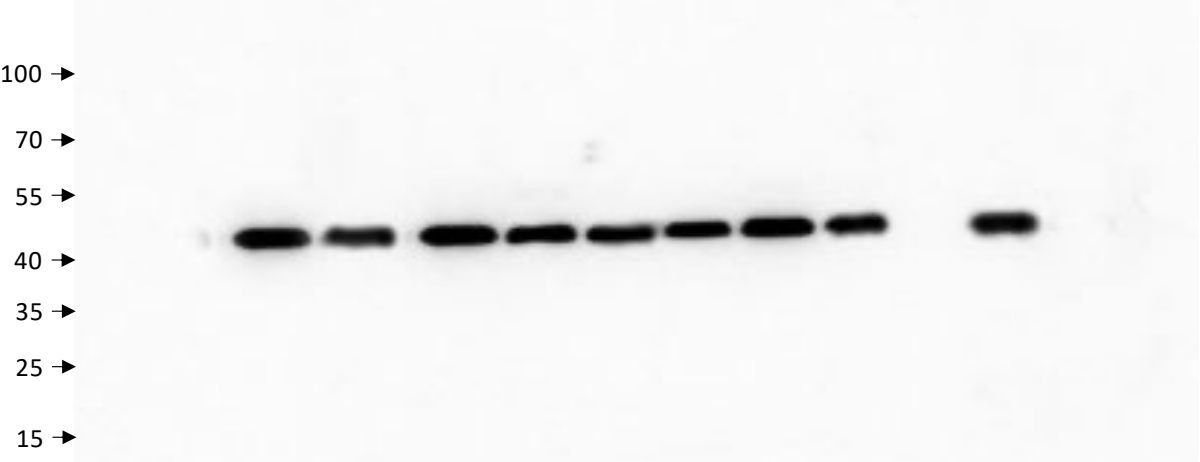

Figure S12: Uncropped blots of the Western blots used for Figure 8.

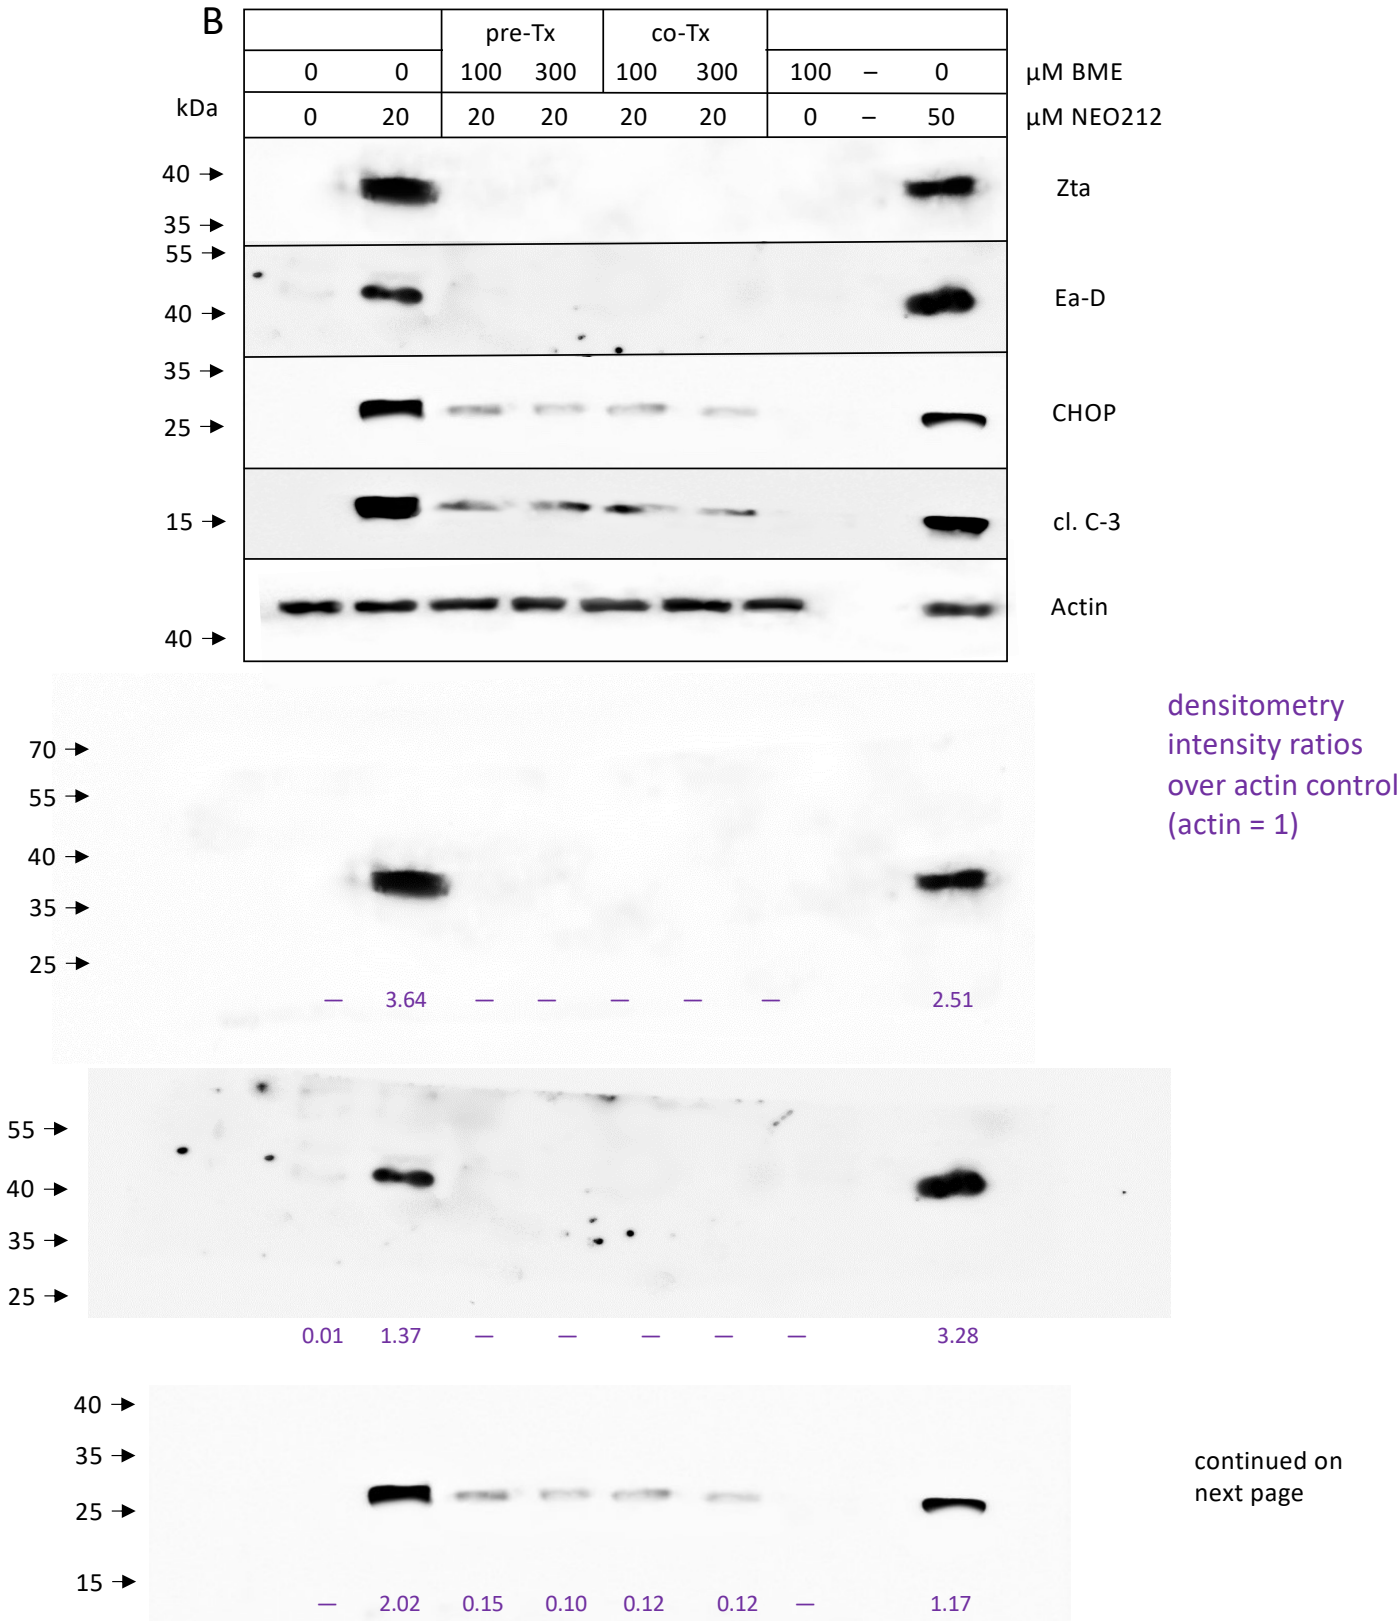

Figure S12 (continued): Uncropped blots of the Western blots used for Figure 8.

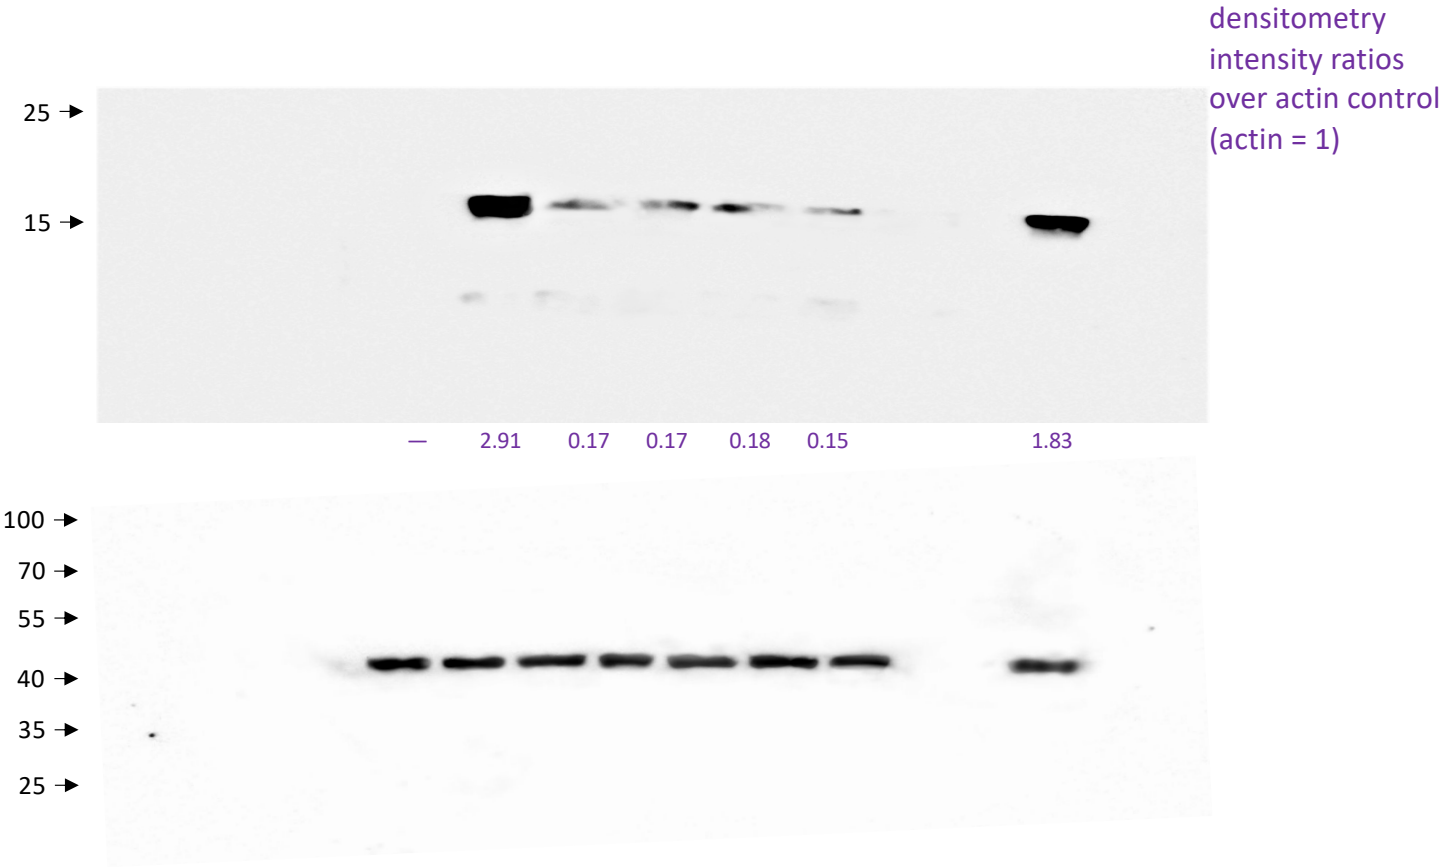

Figure S13: Uncropped blots of the Western blots used for Figure 9.

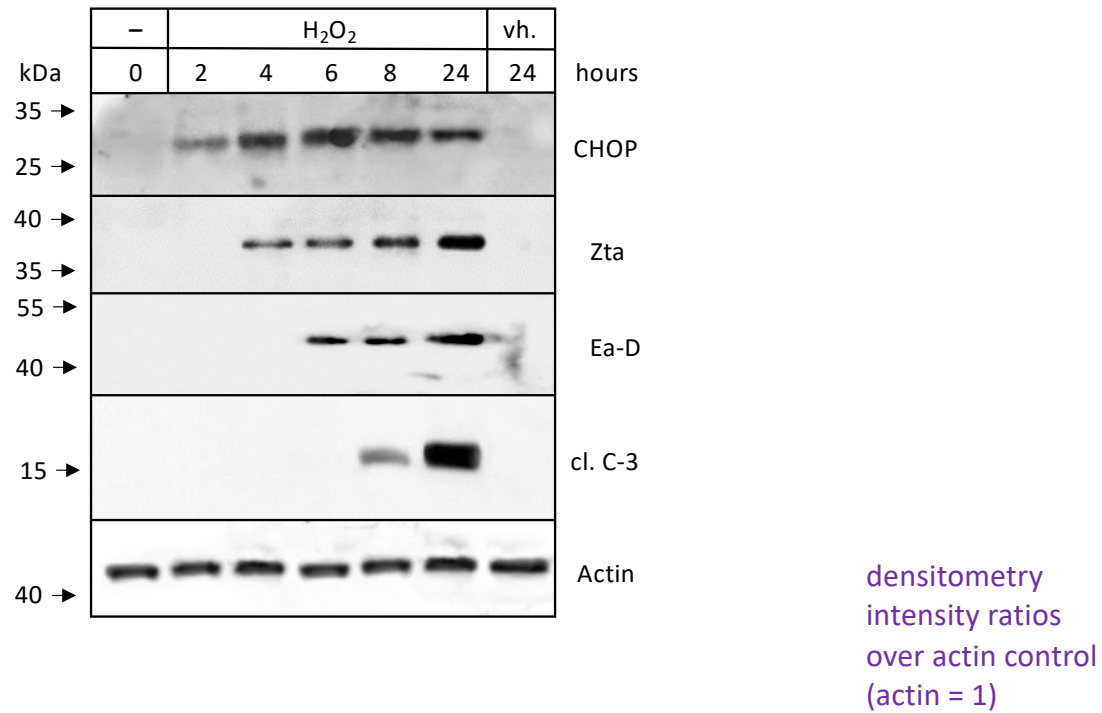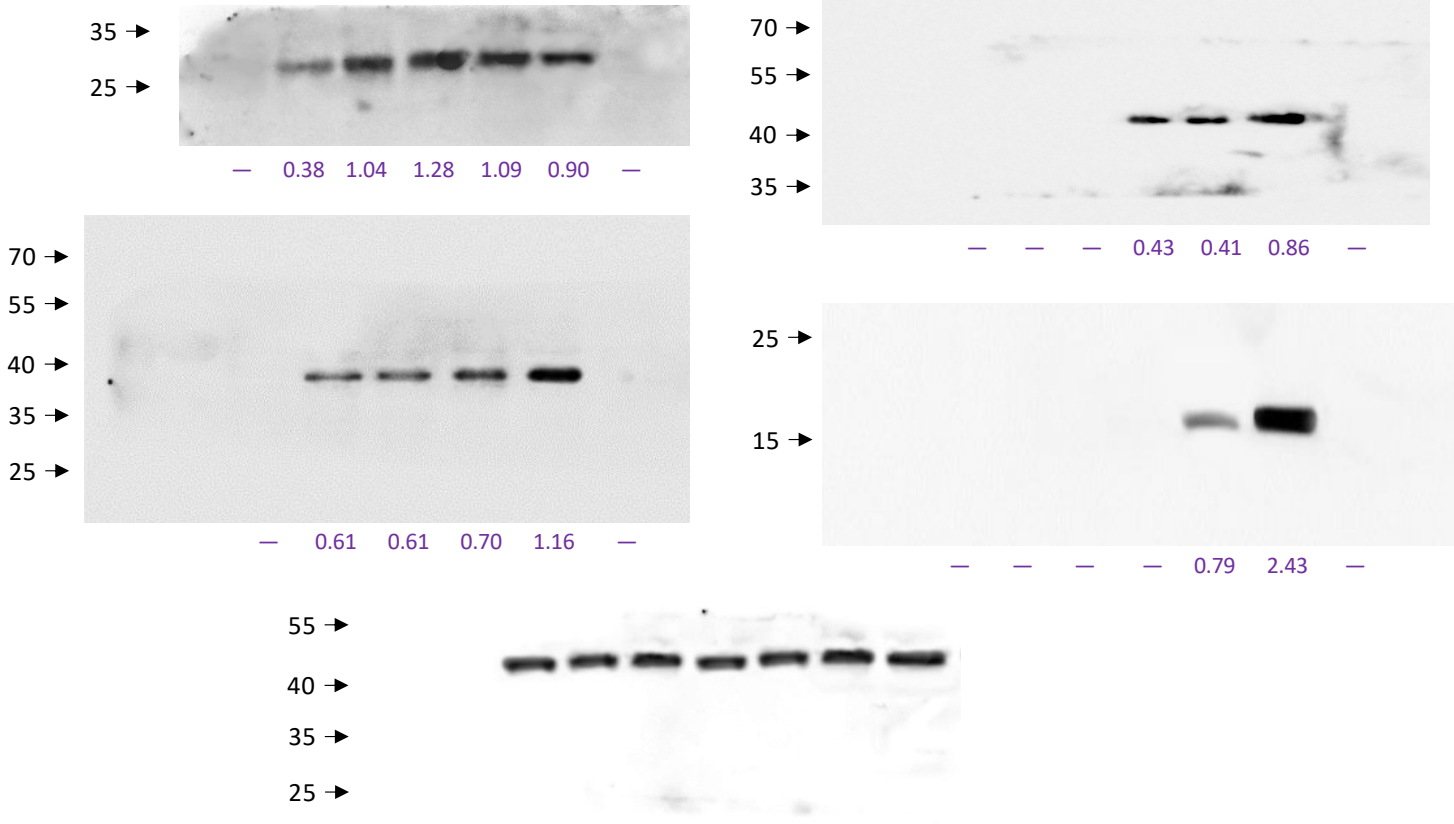

Supplement: s1 [file s1]
